# Supplementary material for: Structural and Morphological Evolution of Lead Dendrites during Electrochemical Migration
Source: PubMed Central journal article supplement — Sci Rep. 2013 Nov 15;3:3227. doi: 10.1038/srep03227 (PMC3828566; doi:10.1038/srep03227), 2013-11-15
Supplement: srep03227-s2.pdf [file srep03227-s2.pdf]

# Supporting Information

for

## **Structural and Morphological Evolution of Lead Dendrites during Electrochemical Migration**

Minghua Sun<sup>1+</sup>, Hong-Gang Liao<sup>1+</sup>, Kaiyang Niu<sup>1+</sup>, Haimei Zheng<sup>1,2\*</sup>

<sup>1</sup>Materials Sciences Division, Lawrence Berkeley National Laboratory, Berkeley CA  
94720 US

+ These authors contribute equally to this work.

\* Correspondence should be addressed to [hmzheng@lbl.gov](mailto:hmzheng@lbl.gov)

This file includes:

Figures S1-S6

Movies S1

Movie caption

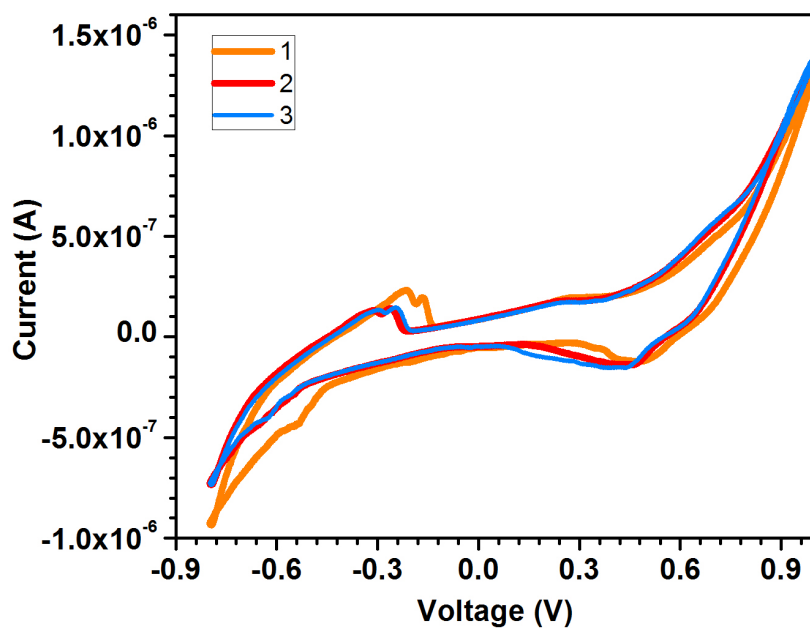

**Figure S1** | Cyclic voltammograms recorded on a fully assembled and sealed biasing liquid cell outside TEM. The cell was loaded with 100 mg/mL lead nitrate solution, fixed in the TEM holder which was connected to an electrochemical workstation. It shows three cycles with reasonable reproducibility. The curves begin at a potential of 0 V, sweep from -0.8 V to 1.2 V and then back to 0 V at a constant voltage ramp rate of 20 mV/second. The plots show that the onset lead deposition occurs at about -0.48V followed by a current peak of  $\sim 2 \times 10^{-7}$  A and the onset lead dissolution happens at about +0.48V with a current peak of  $\sim 2.5 \times 10^{-7}$  A.

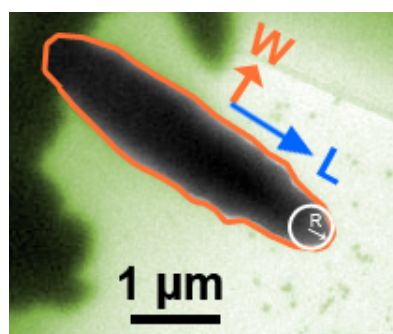

**Figure S2** | Shape analysis of the needle, where W, L and R are the width, length and curvature of the tip, respectively.

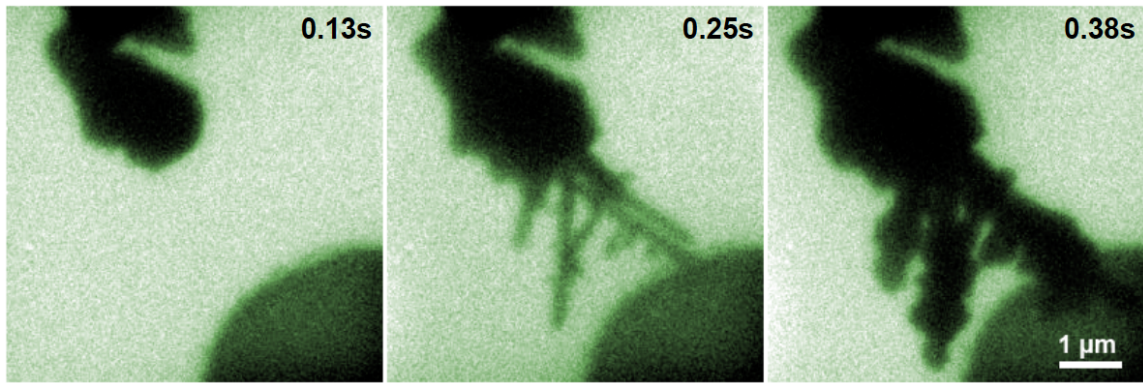

**Figure S3** | Sequential images showing the growth of Pb dendrites induces short circuit of the device. The initial time is arbitrary.

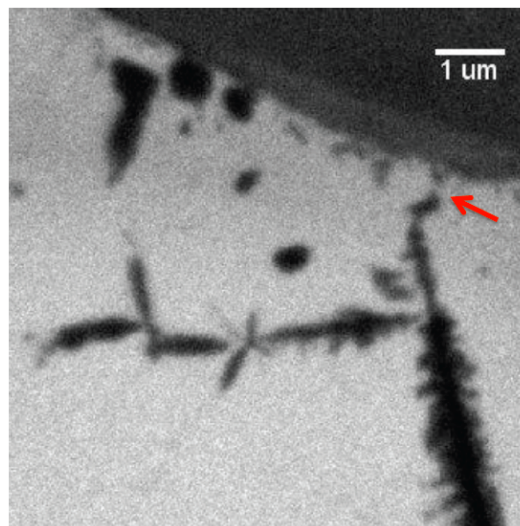

**Figure S4** | The lead dendrite is disconnected from the electrode when the electric bias is reversed.

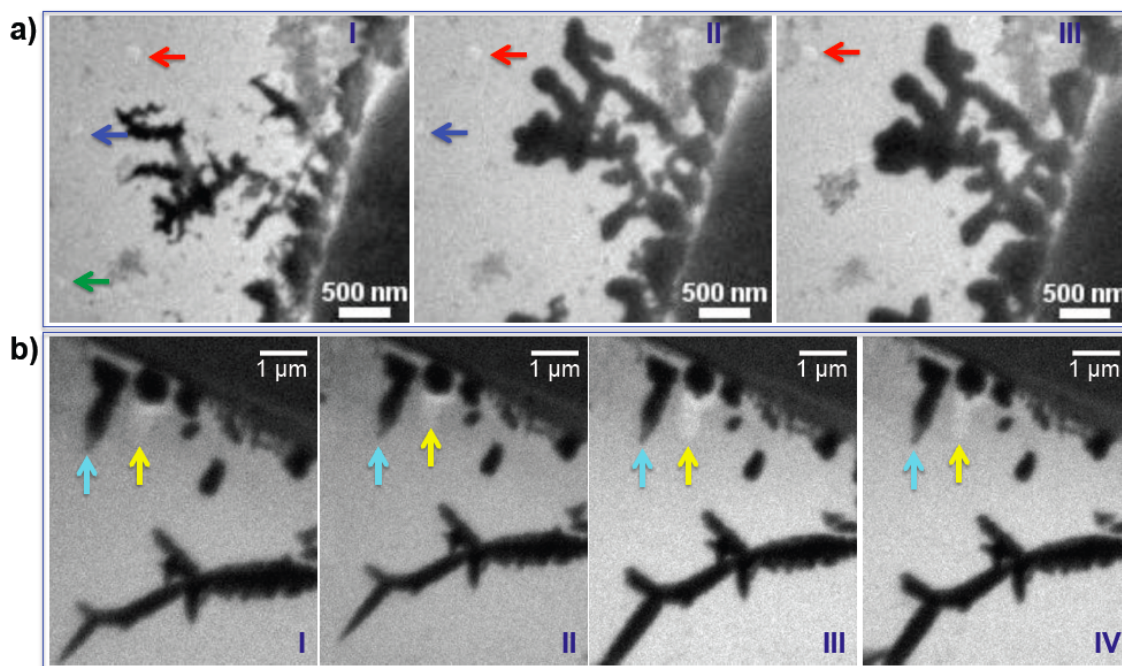

**Figure S5** | Bubbles generated in the electrolyte. a) Sequential images showing bubble migration inside the electrolyte. Bubbles (highlighted by arrows) are likely generated from radiolysis of water. B) Sequential images showing a bubble (highlighted by a yellow arrow) at the solid-liquid interface grows and shrinks, which are synchronized with the neighboring lead branch (highlighted by a blue arrow) growth and dissolution. It is likely electrolysis of water is involved in the bubble generation.

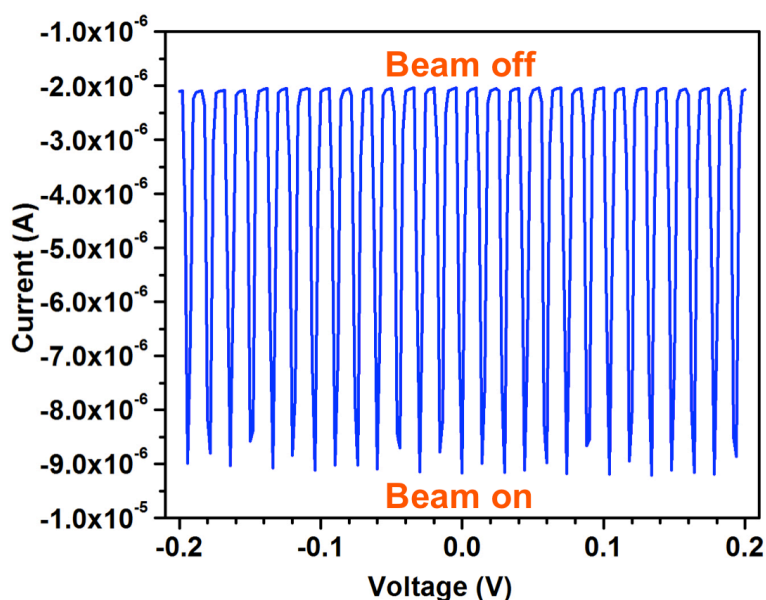

**Figure S6** | TEM beam effects studied by blocking the beam periodically when measuring the electron current. The current with beam on is about 4.5 times of the one with beam off.

## **Movie Caption**

**Movie S1** | In-situ TEM movie showing deposition and dissolution of lead dendritic structure at cyclic voltammetry of -0.8 to 1.2 V and a scan rate of 20 mV/s. The lead concentration in the precursor solution of 100 mg/mL was used. Images drifts are corrected while the original contrast and brightness are maintained. Movie plays 6 times slower than real time.
